# Supplementary material
Source: PubMed Central journal article supplement (PMC3984992)
Supplement: mmc1.pdf [file mmc1.pdf]

## SUPPLEMENTAL FIGURES

### The FRET signatures of non-interacting proteins in membranes: simulations and experiments

Christopher King<sup>2#</sup>, Sarvenaz Sarabipour<sup>1#</sup>, Patrick Byrne<sup>2</sup>, Daniel J. Leahy<sup>2,3</sup>, and Kalina Hristova<sup>1,2\*</sup>

<sup>1</sup>Department of Materials Sciences and Engineering, Johns Hopkins University, Baltimore, Maryland 21218

<sup>2</sup>Program in Molecular Biophysics, Johns Hopkins University, Baltimore, Maryland 21218

<sup>3</sup>Department of Biophysics and Biophysical Chemistry, Johns Hopkins University School of Medicine, Baltimore, Maryland 21205

# contributed equally to this work

[\\*kh@jhu.edu](mailto:*kh@jhu.edu)

**Figure S1.** A random configuration of acceptors (red) surrounding a donor (blue), for acceptor concentration of 0.00071 fluorophores/nm<sup>2</sup>. 40000 such configurations are created, and their FRET efficiency is averaged to create a prediction for “proximity FRET” at this concentration. The fluorophore radius is 1.4 nm; figure not to scale.

**Figure S2. (A)** A configuration of dimers composed of randomly distributed donors and acceptors, for acceptor concentration of 0.00071 fluorophores/nm<sup>2</sup> and donor to acceptor ratio of 0.125. The central dimer in the middle is highlighted with thicker lines; figure not to scale. **(B)** Parameters of the dimer structure.  $D = 50 \text{ \AA}$  and  $r = 1.4 \text{ nm}$ . The value of  $d = 50 \text{ \AA}$  corresponds to an intrinsic FRET efficiency of 0.6 for a dimer labeled with a donor and an acceptor. The angle  $\phi$  is assigned randomly for each dimer.

**Figure S3. (A)** A random configuration of trimers composed of randomly distributed donors and acceptors, for acceptor concentration of 0.0008 fluorophores/nm<sup>2</sup> and donor to acceptor ratio of 0.1667. The central trimer in the middle is highlighted with thicker lines; figure not to scale. **(B)** Parameters that define the trimer structure. In the simulation,  $d = 50 \text{ \AA}$  and  $r = 1.4 \text{ nm}$ . The angle  $\phi$  is assigned randomly for each trimer.

**Figure S4. (A)** A random configuration of tetramers composed of randomly distributed donors and acceptors, for acceptor concentration of 0.0008 fluorophores/nm<sup>2</sup> and donor to acceptor ratio of 0.111. The central tetramer in the middle is highlighted; figure not to scale. **(B)** Tetramer structural parameters. For the simulations,  $d = 50 \text{ \AA}$  and  $r = 1.4 \text{ nm}$ . The angle  $\phi$  is random for each tetramer.

**Figure S5.** A configuration of randomly distributed dimers and monomers, composed of randomly distributed donors and acceptors, for acceptor concentration of 0.00071 fluorophores/nm<sup>2</sup> and donor to acceptor ratio of 0.125. FRET is calculated for the donors placed in the central region. In the simulation,  $d = 50 \text{ \AA}$  and  $r = 1.4 \text{ nm}$ .

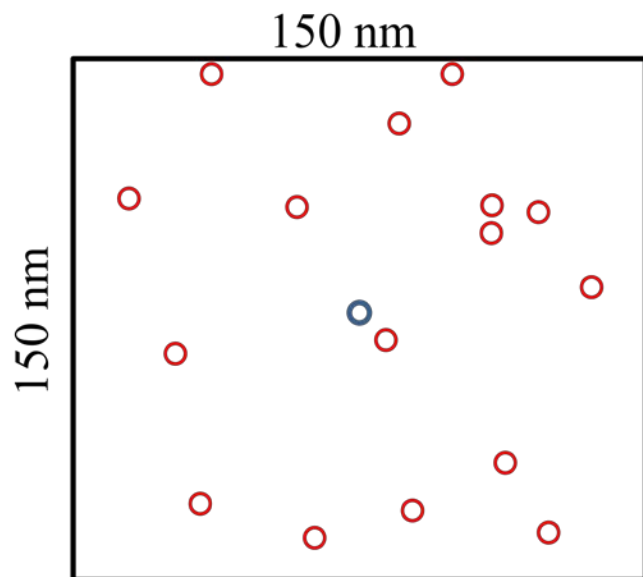

Figure S1

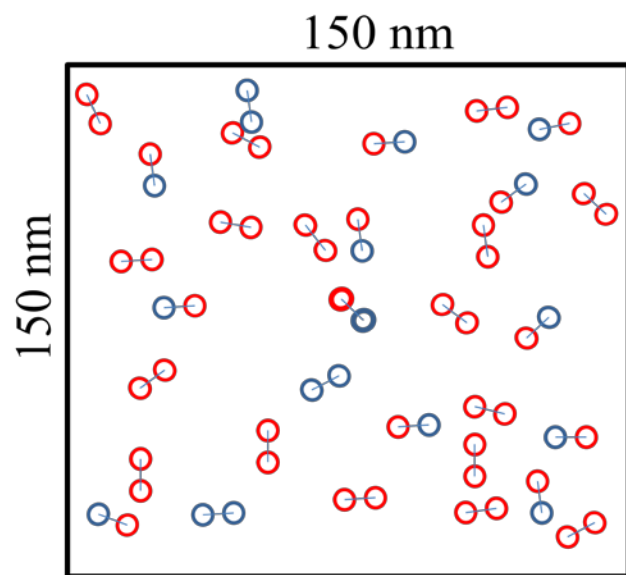

**A**

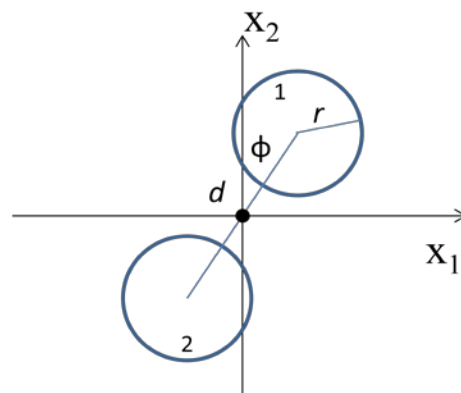

**B**

Figure S2

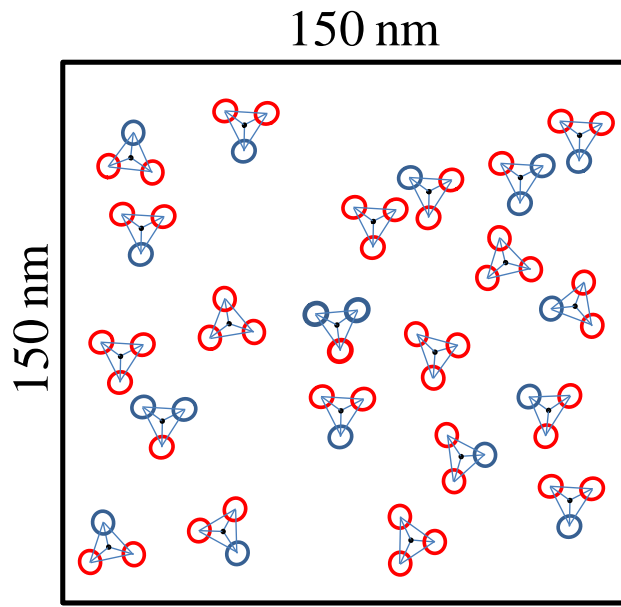

**A**

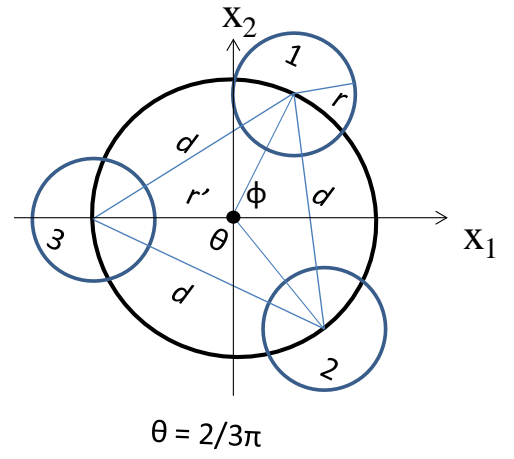

**B**

Figure S3

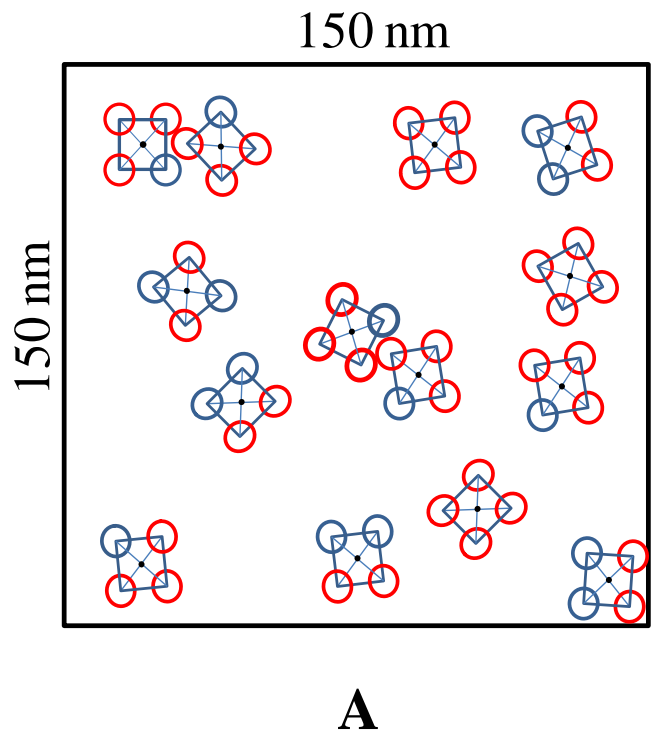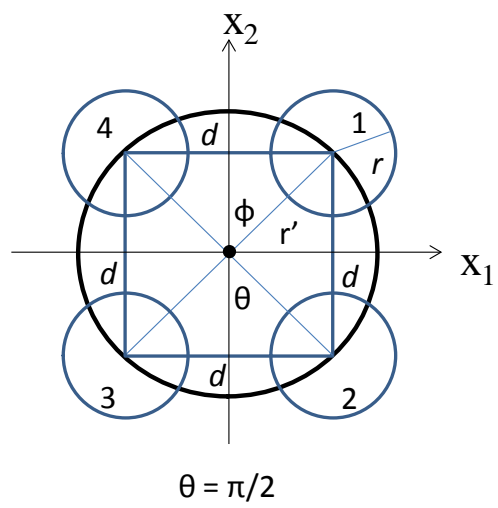

Figure S4

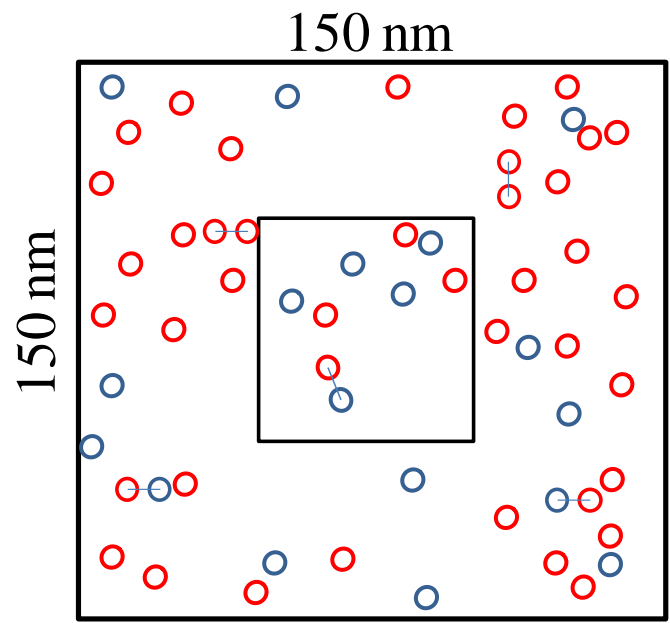

Figure S5
